# Supplementary material for: Syntheses, crystal structure, and photoelectric properties of two Zn-based chalcogenidoantimonates Zn–Sb–Q (Q = S, Se)
Source: Royal Society of Chemistry journal article supplement (doi:10.1039/d3cp04074g), 2023-01-01
Supplement: d3cp04074g1.pdf [file d3cp04074g1.pdf]

## *Electronic Supplementary Information (ESI)*

---

### **Syntheses, crystal structure, and photoelectric properties of two Zn-based chalcogenidoantimonates Zn-Sb-Q (Q=S, Se) †**

Lirong Zhang,<sup>a</sup> Huiling Zhao,<sup>a</sup> Xin Liu,<sup>\*b</sup> Gele Teri<sup>c</sup> and Menghe Baiyin<sup>\*a</sup>

---

*Key Laboratory of Advanced Materials Chemistry and Devices (AMC&DLab) of the Department of Education Inner Mongolia Autonomous Region, College of Chemistry & Environmental Science, Inner Mongolia Normal University, Hohhot 010022, China*

<sup>b</sup> *State Key Laboratory of Fine Chemicals, Frontiers Science Center for Smart Materials Oriented Chemical Engineering Department of Chemistry, Dalian University of Technology Dalian 116024, P. R. China*

<sup>c</sup> *Institute for Science and Applications of Molecular Ferroelectrics, Key Laboratory of the Ministry of Education for Advanced Catalysis Materials, Zhejiang Normal University, Jinhua 321004, China.  
E-mail: 1547223044@qq.com*

\* E-mail: xliu@dlut.edu.cn, baiymh@imnu.edu.cn

#### **Electronic Supplementary Information Index**

##### **1. Experimental Section**

###### **1.1 Single-Crystal Structure Characterizations**

##### **2. Computational Details**

##### **3. Figures and Tables**

**Figure S1.** SEM image and EDS analysis of **1**.

**Figure S2.** SEM image and EDS analysis of **2**.

**Figure S3.** Powder XRD pattern of **1** and **2**.

**Figure S4.** Infrared spectra of **1** and **2**.

**Figure S5.** DTA curves for **1** and **2**.

**Table S1.** Summary table of coordination numbers and degradation rates of MB for antimony chalcogenides containing zinc.

**Table S2.** Selected bond lengths (Å) and angles (°) for **1**.

**Table S3.** Selected bond lengths (Å) and angles (°) for **2**.

##### **4. References**

## 1. Experimental Section

### 1.1 Single-Crystal Structure Characterizations

Structural analyses were carried out on a Rigaku Raxis-Rapid X-ray diffractometer (Rigaku, Japan), and diffracted structural data were collected using an APEX-II CCD single-crystal diffraction from Bruker, Germany, with a graphite monochromator and Mo-K $\alpha$  radiation ( $\lambda = 0.071073$  nm). All calculated diffracted structural data were corrected for  $L_p$  factor and empirical absorption factor, structural data were solved by direct calculation method, all non-hydrogen atom coordinate data were determined directly by difference Fourier synthesis method, and all non-hydrogen atom coordinate parameters and anisotropic thermal parameters were corrected by full-matrix least squares method. The structural calculation data were done directly with the *Olex2* program.<sup>1</sup> The CCDC numbers for compounds **1** and **2** are 2280314 and 2280315, respectively.

### 2. Computational Details

Spin-polarized first-principles-based calculations were performed with Cambridge Sequential Total Energy Package (CASTEP)<sup>2-3</sup> with Perdew–Burke–Ernzerhof (PBE) functional<sup>4</sup> within GGA.<sup>5</sup> The crystal structures of compounds [Zn(tren)]<sub>2</sub>Sb<sub>2</sub>Se<sub>5</sub> (**1**) and [Zn(tepa)H]<sub>2</sub>Sb<sub>2</sub>S<sub>6</sub> (**2**) were firstly fully optimized without any constrains. All the calculations were performed with On-the-fly-generated (OFTG) ultrasoft pseudopotentials and the energy cutoff was set as 435.40 eV based on convergence tests.<sup>6-7</sup> Monkhorst k-point grids with separation smaller than 0.03 Å were used for the Brillouin-zone integrations.<sup>8</sup>

### 3. Figures and Tables

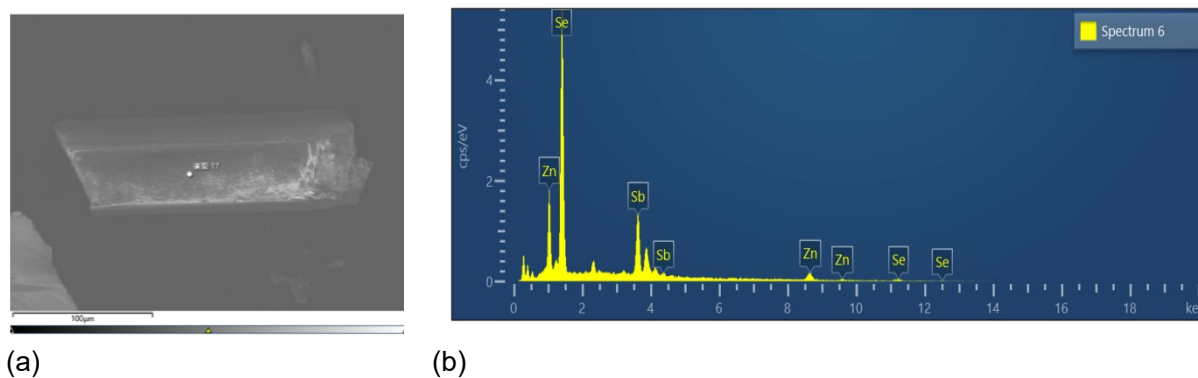

**Figure S1.** SEM image (a) and EDS analysis (b) of **1**.

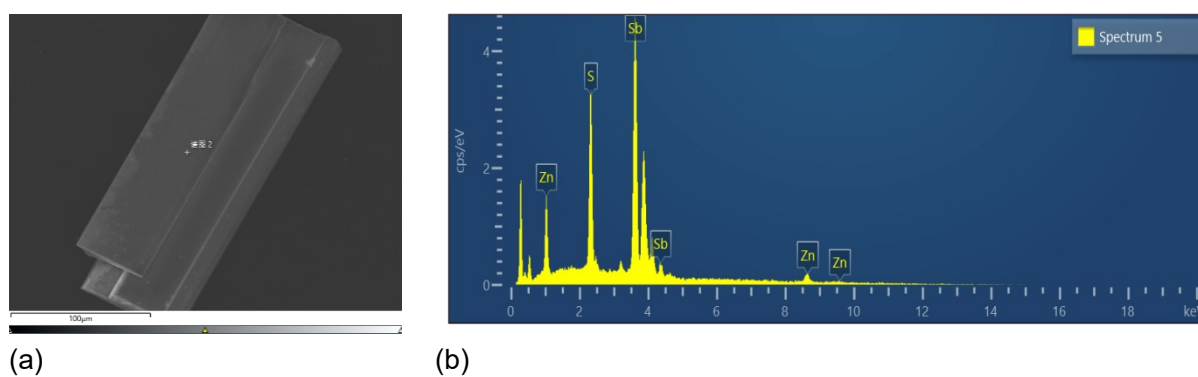

**Figure S2.** SEM image (a) and EDS analysis (b) of **2**.

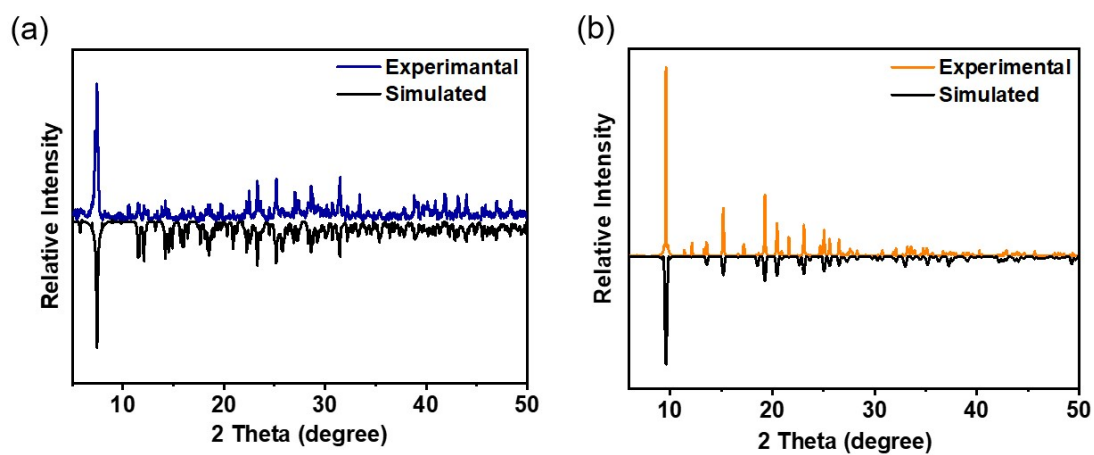

**Figure S3.** Powder XRD pattern of **1** (a) and **2** (b).

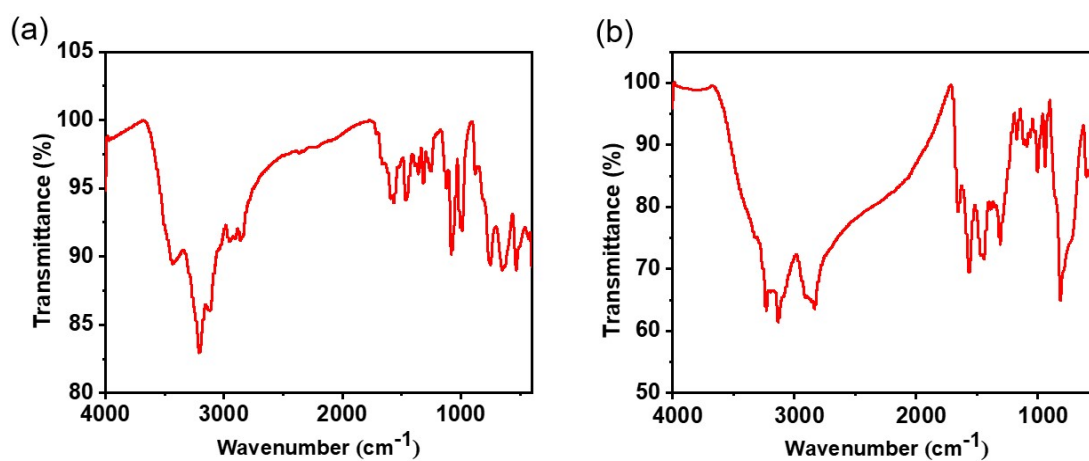

**Figure S4.** Infrared spectra of **1** (a) and **2** (b).

## Electronic Supplementary Information (ESI)

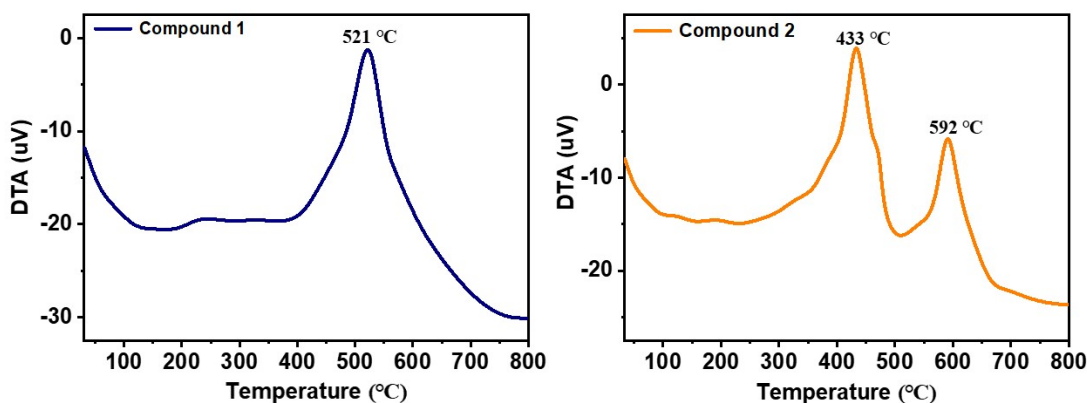

**Figure S5.** DTA curves for **1** (a) and **2** (b).

**Table S1.** Summary table of coordination numbers and degradation rates of MB for antimony chalcogenides containing zinc.

| Formula                                                                                                                           | Coordination number of Zn and Sb atoms | Efficiency (%) | Ref.      |
|-----------------------------------------------------------------------------------------------------------------------------------|----------------------------------------|----------------|-----------|
| [Zn(trien)]Sb <sub>4</sub> S <sub>7</sub>                                                                                         | Zn (5); Sb (3 and 4)                   | Not found      | [9]       |
| [Zn(dap) <sub>3</sub> ] <sub>2</sub> (Sb <sub>2</sub> Se <sub>3</sub> )·H <sub>2</sub> O                                          | Zn (6); Sb (3)                         | Not found      | [10]      |
| [Zn(C <sub>4</sub> H <sub>13</sub> N <sub>3</sub> ) <sub>2</sub> ] <sub>n</sub> [CdSb <sub>2</sub> Se <sub>5</sub> ] <sub>n</sub> | Zn (6); Sb (3)                         | Not found      | [11]      |
| [Zn(tren)Sb <sub>4</sub> S <sub>7</sub> ]                                                                                         | Zn (5); Sb (4)                         | Not found      | [12]      |
| [Zn(tren) <sub>2</sub> H]SbSe <sub>4</sub>                                                                                        | Zn (5); Sb (4)                         | Not found      | [13]      |
| [Ni(1,2-dap) <sub>3</sub> ] <sub>2</sub> Zn(1,2-dap)Sb <sub>2</sub> Se <sub>8</sub>                                               | Zn (4); Sb (4)                         | Not found      | [13]      |
| Rb <sub>2</sub> ZnSb <sub>4</sub> S <sub>8</sub>                                                                                  | Zn (4); Sb (3)                         | Not found      | [13]      |
| Cu <sub>2</sub> ZnSbS <sub>4</sub>                                                                                                | Zn (4); Sb (4)                         | Not found      | [14]      |
| Cs <sub>2</sub> ZnSb <sub>2</sub> S <sub>5</sub>                                                                                  | Zn (4); Sb (3 and 4)                   | 69 %           | [15]      |
| [Zn(tren)] <sub>2</sub> Sb <sub>2</sub> Se <sub>5</sub>                                                                           | Zn (5); Sb (3)                         | 88.2 %         | This work |
| [Zn(tepa)H] <sub>2</sub> Sb <sub>2</sub> S <sub>6</sub>                                                                           | Zn (6); Sb (4)                         | 82.4 %         | This work |

**Table S2.** Selected bond lengths [Å] and angles [°] for **1**.

|         |           |             |            |
|---------|-----------|-------------|------------|
| Zn1-N1  | 2.068(4)  | N2-Zn1-N3   | 75.73(15)  |
| Zn1-N2  | 2.438(4)  | N3-Zn1-N4   | 116.81(18) |
| Zn1-N3  | 2.114(4)  | N4-Zn1-N1   | 109.21(18) |
| Zn1-N4  | 2.053(4)  | N5-Zn2-N6   | 118.6(2)   |
| Zn1-Se1 | 2.4842(8) | N6-Zn2-N7   | 77.89(17)  |
| Zn2-N5  | 2.094(5)  | N7-Zn2-N8   | 78.03(15)  |
| Zn2-N6  | 2.110(5)  | Se1-Sb1-Se2 | 100.59(2)  |
| Zn2-N7  | 2.358(4)  | Se3-Sb2-Se4 | 97.67(2)   |
| Zn2-N8  | 2.069(4)  | N2-Zn1-Se1  | 172.33(11) |

## *Electronic Supplementary Information (ESI)*

---

|           |           |            |            |
|-----------|-----------|------------|------------|
| Zn2-Se4   | 2.4637(8) | N4-Zn1-Se1 | 109.43(12) |
| Sb1-Se1   | 2.5646(6) | N3-Zn1-Se1 | 97.47(12)  |
| Sb1-Se2   | 2.4978(7) | N5-Zn2-Se4 | 95.62(15)  |
| Sb2-Se3   | 2.4734(7) | N7-Zn2-Se4 | 171.66(11) |
| Sb2-Se4   | 2.5210(7) | N8-Zn2-Se4 | 108.53(11) |
| N1-Zn1-N2 | 77.23(15) |            |            |

---

**Table S3.** Selected bond lengths [ $\text{\AA}$ ] and angles [ $^\circ$ ] for **2**.

---

|           |            |                         |            |
|-----------|------------|-------------------------|------------|
| Zn1-N1    | 2.147(6)   | N4-Zn1-N5               | 87.8(2)    |
| Zn1-N2    | 2.193(5)   | N4-Zn1-N2               | 141.7(2)   |
| Zn1-N3    | 2.237(5)   | S1-Sb1-S3               | 119.10(6)  |
| Zn1-N4    | 2.164(5)   | S1-Sb1-S2 <sup>1</sup>  | 108.69(6)  |
| Zn1-N5    | 2.234(5)   | S1-Sb1-S2               | 111.45(6)  |
| Sb1-S1    | 2.3144(15) | S2 <sup>1</sup> -Sb1-S2 | 94.00(5)   |
| Sb1-S2    | 2.4587(15) | S3-Sb1-S2 <sup>1</sup>  | 110.11(6)  |
| Sb1-S3    | 2.3549(17) | S3-Sb1-S2               | 110.59(6)  |
| Zn1-S3    | 2.5821(18) | N1-Zn1-S3               | 165.9(2)   |
| N1-Zn1-N2 | 95.6(2)    | N2-Zn1-S3               | 90.91(15)  |
| N1-Zn1-N3 | 165.9(2)   | N3-Zn1-S3               | 81.63(14)  |
| N2-Zn1-N3 | 76.7(2)    | N4-Zn1-S3               | 111.83(15) |
| N3-Zn1-N4 | 76.7(2)    | N5-Zn1-S3               | 113.6(2)   |

---

Symmetry transformations used to generate equivalent atoms: <sup>1</sup>-X, -Y, 1-Z

#### 4. References

- [1] O. V. Dolomanov, L. J. Bourhis, R. J. Gildea, J. A. K. Howard and H. Puschmann, OLEX2: A complete structure solution, refinement and analysis program. *J. Appl. Cryst.* 2009, **42**, 339-341.
- [2] M. C. Payne, M. P. Teter, D. C. Allan, T. A. Arias and J. D. Joannopoulos, Iterative minimization techniques for ab initio total-energy calculations: molecular dynamics and conjugate gradients. *Rev. Mod. Phys.* 1992, **64**, 1045-1097.
- [3] S. J. Clark, M. D. Segall, C. J. Pickard, P. J. Hasnip, M. J. Probert, K. Refson and M. C. Payne, First principles methods using CASTEP. *Z Krist-Cryst Mater.* 2005, **220**, 339-341.

## *Electronic Supplementary Information (ESI)*

---

- [4] J. P. Perdew, K. Burke and M. Ernzerhof, Generalized gradient approximation made simple. *Phys. Rev. Lett.* 1996, **77**, 3865-3868.
- [5] J. P. Perdew and Y. Wang, Accurate and simple analytic representation of the electron-gas correlation energy. *Phys. Rev. B*, 1992, **45**, 13244-13249.
- [6] K. Lejaeghere, V. V. Speybroeck, G. O. Van and S. Cottenier, Error Estimates for Solid-State Density-Functional Theory Predictions: An Overview by Means of the Ground-State Elemental Crystals. *Crit. Rev. Solid State Mat. Sci.* 2014, **39**, 1-24.
- [7] D. Vanderbilt, Soft Self-Consistent Pseudopotentials in a Generalized Eigenvalue Formalism. *Phys. Rev. B* **1990**, *41*, 7892-7895.
- [8] H. J. Monkhorst, J. D. Pack. Special Points for Brillouin-zone Integrations. *Phys. Rev. B* **1976**, *13*, 5188-5192.
- [9] H. Lühmann, Z. Rejai, K. Möller, P. Leisner, M. E. Ordolff, C. Näther and W. Bensch, On the Flexibility of Thioantimonate Networks: Solvothermal Syntheses and Crystal Structures of Six New Thioantimonates(III) with the  $[\text{Sb}_4\text{S}_7]^{2-}$  Anion, *Z. Anorg. Allg. Chem.*, 2008, **634**, 1687-1695.
- [10] G. Q. Bian, J. Zhou, C. Y. Li, N. Cheng, X. M. Lin, Y. Zhang and J. Dai, Solvothermal synthesis and crystal structure of  $[\text{M}(\text{dap})_3]_2(\text{Sb}_2\text{Se}_5) \cdot x\text{H}_2\text{O}$  ( $\text{M}=\text{Ni}$ ,  $x=2$ ;  $\text{M}=\text{Zn}$ ,  $x=0$ ), *Chemical research and application.*, 2008, **20**, 53-57.
- [11] H. Jiang, X. Wang, T. L. Sheng, S. M. Hu, R. B. Fu, Y. H. Wen, C. J. Shen, N. Yuan and X. T. Wu, Solvothermal synthesis and characterization of a novel selenidoantimonate:  $[\text{M}^1(\text{C}_4\text{H}_{13}\text{N}_3)_2]_n[\text{M}^2\text{Sb}_2\text{Se}_5]_n$  ( $\text{M}^1 = \text{Mn}$ ,  $\text{Co}$ ,  $\text{M}^2 = \text{Zn}$ ,  $\text{Cd}$ ), *Sci China Chem.*, 2011, **41**, 726-731.
- [12] B. Seidlhofer, E. Antonova, J. Wang, D. Schinkel and Wolfgang Bensch, On the Complexity of Crystallization of Thioantimonates: In-situ Energy Dispersive X-ray Diffraction (EDXRD) Studies of the Solvothermal Formation of the Isostructural Thioantimonates  $[\text{TM}(\text{tren})\text{Sb}_4\text{S}_7]$  ( $\text{TM} = \text{Fe}$ ,  $\text{Zn}$ ), *Z. Anorg. Allg. Chem.* 2012, **15**, 2555-2564.
- [13] M. G. Shele, X. Y. Tian and M. H. Baiyin, Solvothermal synthesis and properties of three antimony chalcogenides containing transition metal zinc, *J Solid State Chem.*, 2021, **302**, 122401.
- [14] E. M. Heppke, S. Klenner, O. Janka, R. Pöttgen, T. Bredow and M. Lerch,  $\text{Cu}_2\text{ZnSbS}_4$ : A Thioantimonate (V) with Remarkably Strong Covalent Sb-S Bonding, *Inorg. Chem.*, 2021, **60**,

## *Electronic Supplementary Information (ESI)*

---

2730-2739.

- [15] N. Li, G. L. Teri, M. G. Shele, Sagala, Namila, M. H. Baiyin, The Solvothermal Synthesis and Properties of Thioantimonates  $\text{Rb}(1,4\text{-DABH})\text{Sb}_4\text{S}_7$  and  $\text{Cs}_2\text{ZnSb}_2\text{S}_5$ : 1D Anion Chains and 2D Anion Layer, *J Clust Sci.*, 2023, **34**, 1853-1860.
